# Supplementary material for: Innovative super-resolution in spatial transcriptomics: a transformer model exploiting histology images and spatial gene expression
Source: PubMed Central journal article supplement — Brief Bioinform. 2024 Mar 2;25(2):bbae052. doi: 10.1093/bib/bbae052 (PMC10939304; doi:10.1093/bib/bbae052), 2024-03-02
Supplement: bib_transformerst_supplementary_material_bbae052.pdf [file bib_transformerst_supplementary_material_bbae052.pdf]

## Supplementary Material 1473

### S1 Additional Data 1474

In addition to the data utilized in the main body of our paper, we employed several publicly available datasets in the supplementary material. These datasets can be accessed via the following websites or using the provided accession numbers: (1) Stereo-seq data[48]. 1475  
1476  
1477  
1478  
1479  
1480

### S2 Comparison baselines 1481

Our experimental results demonstrate that our approach achieves very high accuracy. However, it is important to note that previous literature on these methods has some limitations: 1482  
1483

1. Previous spatial transcriptomics analysis methods have not been able to enhance gene expression to single-cell resolution without using single-cell RNA-seq data. 1484  
1485  
1486  
1487  
1488  
1489

2. Certain deconvolution methods use public single-cell RNA-seq references, including the Human Cell Atlas, the BRAIN Initiative Cell Census Network (BICCN), and the Human BioMolecular Atlas, to address the problem of low resolution in spatial transcriptomics. However, these methods are prone to incomplete identification of cell types due to batch effects and tissue heterogeneity in samples. Additionally, the accuracy of deconvolution may be impacted by the different perturbations that affect single-cell references and spatial transcriptomics. 1490  
1491  
1492  
1493  
1494  
1495  
1496  
1497

To overcome these limitations, we propose a novel framework called TransformerST, which utilizes a Transformer-based approach to associate the heterogeneity of local gene expression properties and reveal the structural relationships at nearly single-cell resolution. We have also included a table that compares the features of various spatial transcriptomics analysis methods, highlighting their respective strengths and limitations (Supplementary Table 1). 1498  
1499  
1500  
1501  
1502  
1503  
1504  
1505

### S3 Tissue identification with Stereo-seq technology 1506

We use the proposed method to a Stereo-seq dataset derived from mouse olfactory bulb tissue. Nowadays, stereo-seq is one of the most promising new spatial holography methods available. DNA nanosphere-patterned array chips provide spatial resolution down to the subcellular level. The information in this study was split down to a cellular level (14 m) for clarity. The rostral migratory stream (RMS), granular cell layer (GCL), endothelial cell layer (GCL), internal plexiform layer (IPL), filamentous cell layer (MCL), exterior plexiform layer (EPL), and olfactory nerve layer were all labeled in DAPI-stained pictures of 1507  
1508  
1509  
1510  
1511  
1512  
1513  
1514  
1515  
1516  
1517  
1518

1519 **Supplementary Table 1** Comparison between TransformerST with baselines.

| 1520 | Methods       | Objective                    | Super-resolution | Reference-free | Histology image |
|------|---------------|------------------------------|------------------|----------------|-----------------|
| 1521 | TransformerST | Clustering, super-resolution | Single-cell      | Yes            | Yes             |
| 1522 | SpaGCN        | Clustering                   | Original         | No             | Yes             |
| 1523 | BayesSpace    | Clustering, super-resolution | Multi-cellular   | Yes            | No              |
| 1524 | CCST          | Clustering                   | Original         | No             | No              |
| 1525 | STAGATE       | Clustering                   | Original         | No             | No              |
| 1526 | DeepST        | Clustering                   | Original         | No             | Yes             |
| 1527 | stLearn       | Clustering                   | Original         | No             | No              |
| 1528 | STdeconvolve  | Deconvolution                | Multi-cellular   | Yes            | No              |

1536

1537 the coronal mouse olfactory bulb by Fu et al.[48]. The results are shown in Sup-  
 1538 plementary Supplementary Fig. 1. The results derived from TransformerST  
 1539 align with the Allen Reference Atlas, as depicted in Supplementary Supple-  
 1540 mentary Fig. 1b, demonstrating the method’s precision and consistency. In  
 1541 Supplementary Supplementary Fig. 1c, TransformerST, utilizing the original  
 1542 spot resolution, yielded results that closely mirrored those of the Allen Re-  
 1543 ference Atlas. This showcases its capacity to capture intricate gene expression  
 1544 patterns and cellular structures.

1545

1546 Furthermore, in Supplementary Supplementary Fig. 1d, TransformerST  
 1547 effectively reconstructed the original resolution of spatial transcriptomics data  
 1548 using downsampled inputs. The outcomes closely resembled those in the Allen  
 1549 Reference Atlas, underscoring TransformerST’s robustness and flexibility in  
 1550 managing various data resolutions and ensuring accurate results irrespective  
 1551 of input quality.

1552

1553 The compatibility of TransformerST with the Allen Reference Atlas can  
 1554 also be attributed to its sophisticated algorithms. These enable the precise  
 1555 identification of spatial gene expression patterns and facilitate the extraction of  
 1556 biologically significant information. Additionally, the method’s robust feature  
 1557 extraction and pattern recognition capabilities aid in effectively distinguishing  
 1558 between different cell types, tissue structures, and gene expression patterns.  
 1559 Moreover, TransformerST’s versatility allows it to be applied across multi-  
 1560 ple platforms and datasets, maintaining consistent performance under a wide  
 1561 array of experimental conditions. This adaptability ensures the method’s reli-  
 1562 ability and relevance, further reinforcing its alignment with the established  
 1563 Allen Reference Atlas.

1562

1563 In conclusion, the concordance between the results obtained from Trans-  
 1564 formerST and the Allen Reference Atlas can be attributed to the method’s

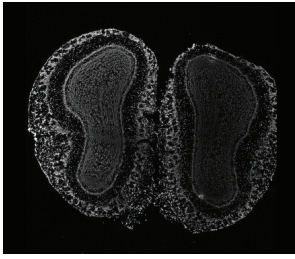

(a) Original Image

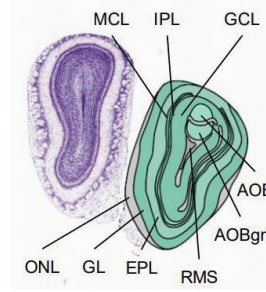

(b) Allen Reference Atlas

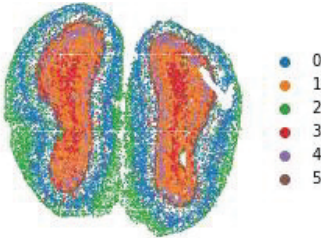

(c) TransformerST

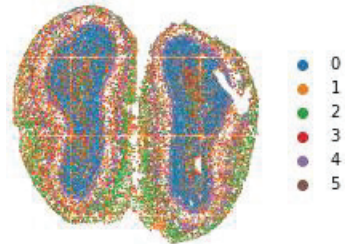

(d) Super-resolution

**Supplementary Figure 1** TransformerST improves the identification of known tissue structures in the olfactory bulb tissue

precision, consistency, adaptability, and its ability to effectively manage various data resolutions. These attributes position TransformerST as a valuable tool in spatial transcriptomics analysis, offering researchers reliable and biologically pertinent insights.

We applied the proposed methods to a segment of mouse lung tissue profiled by Stereo-seq and found that the spatial regions identified by the method showed strong concordance with the patterns of the original image (Supplementary Supplementary Fig. 2). This underscores the effectiveness of our approach in accurately delineating tissue structures and gene expression patterns, a critical aspect for understanding the complex biological processes within the sample. The method's ability to yield results consistent with expert annotations underscores its potential as a valuable tool for spatial transcriptomics analysis across diverse tissue types and experimental conditions. We also showcase the results of the BayesSpace method in Supplementary Supplementary Fig. 2d, which uses the original data for tissue type clustering. Our simulation outcome aligns with the results of BayesSpace. Importantly, our simulation results for super-resolution with downsampled data are capable of producing more refined patterns that closely mirror the original image.

1565  
1566  
1567  
1568  
1569  
1570  
1571  
1572  
1573  
1574  
1575  
1576  
1577  
1578  
1579  
1580  
1581  
1582  
1583  
1584  
1585  
1586  
1587  
1588  
1589  
1590  
1591  
1592  
1593  
1594  
1595  
1596  
1597  
1598  
1599  
1600  
1601  
1602  
1603  
1604  
1605  
1606  
1607  
1608  
1609  
1610

1611  
1612  
1613  
1614  
1615  
1616  
1617  
1618  
1619  
1620  
1621  
1622  
1623  
1624  
1625  
1626  
1627

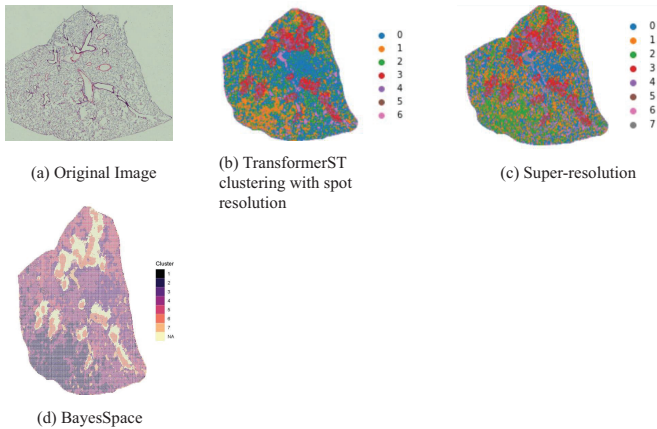

1628 **Supplementary Figure 2** TransformerST improves the identification of known tissue  
1629 structures in the mouse lung tissue

1630

1631 This further attests to the effectiveness of our proposed approach in handling  
1632 various resolutions and providing detailed spatial transcriptomics analysis.

1633 For both datasets, our proposed method produced visually superior tissue  
1634 identification and super-resolution results when compared to other methods.  
1635 In the two figures, 'TransformerST' denotes the clustering result at the origi-  
1636 nal resolution, while 'Super-resolution' refers to the super-resolution outcome  
1637 achieved by TransformerST. BayesSpace denotes the result achieved when data  
1638 at the original resolution is employed for tissue type clustering.

1639

## 1640 S4 Enhanced Gene Expression Prediction at 1641 Sub-cellular Resolution 1642

1643 **Enhanced Gene expression prediction at sub-cellular resolution in**  
1644 **breast cancer data HER2+.** To evaluate the tissue identification and super-  
1645 resolution performance in predicting gene expression at sub-cellular resolution  
1646 using histology images, we employed the leave-one-out method (36 fold) using  
1647 HER2+ breast cancer data, which includes 36 tissue sections from 8 patients.  
1648 This approach underscores the effectiveness in gene expression prediction and  
1649 super-resolution. For the leave-one-out evaluation, 32 sections were utilized to  
1650 train the tissue identification and super-resolution model, with the remaining  
1651 sections reserved for evaluation. The results of this approach are represented  
1652 as TransformerST. We also assessed the super-resolution performance at the  
1653 sub-cellular level, referred to as Super-resolution.

1654 Manual annotation of three tissue sections was included for evaluating  
1655 clustering accuracy [49]. We compared our proposed method, TransformerST,  
1656

**Supplementary Table 2** Average correlation of predicted expression for top 50 most highly variable genes (HVG) compared to ground truth expressions on held out dataset

| Methods       | HVG   |
|---------------|-------|
| TransformerST | 0.226 |
| BLEEP         | 0.168 |
| TCGN          | 0.151 |

with TCGN [37] and BLEEP [36] for gene expression prediction using three tissue sections, as detailed in Supplementary Fig. 3. TCGN and BLEEP, in comparison, demonstrated less effective gene prediction performance. The leave-one-out evaluation showed a higher correlation with biological interpretation.

TransformerST markedly improved clustering accuracy (ARI) for the evaluated sections out of the 32 samples, significantly outperforming TCGN and BLEEP. This advancement in clustering accuracy by TransformerST is evident in the results for sample B1 (Supplementary Fig. 3a), where TransformerST achieved the highest clustering accuracy (ARI of 0.308 for TransformerST compared to lower ARIs for TCGN and BLEEP). Similarly, Supplementary Fig. 3b displays the superiority of TransformerST (ARI=0.325) over TCGN and BLEEP. These results might be due to substantial gene expression differences among patients, which led to the leave-one-out evaluation by TransformerST attaining superior tissue identification performance, as shown in Supplementary Fig. 3). Supplementary Table 2 displays the performance comparison of BLEEP, TCGN, and TransformerST in predicting the top 50 most highly variable genes (HVG). In this assessment, the expression profiles predicted by TransformerST showed the strongest correlation with the actual data among all gene sets.

The enhanced single-cell resolution results further demonstrate TransformerST could predict the biological meaningful patterns as in the manual annotations. While it is hard to estimate the ARI for the super-resolution result, the study is visually consistent with the manual annotations by pathologists in the spatial domain (Supplementary Fig. 3).

## S5 Meta Gene and SVGs Analysis with DLPFC and IDC Samples

To further demonstrate that TransformerST could explore the biological relevance, we detected the spatial variable genes and meta genes for LIBD human dorsolateral prefrontal cortex (DLPFC) data and IDC sample. As shown in Supplementary Fig. 4a, SVGs and their corresponding meta gene show similar spatial patterns for human DLPFC samples at spot resolution. For example, TMSB10 is enriched in cluster 0 of tissue sample 151508. The combination of meta genes (TMSB10+MBP-MT-CO2) shows the strengthened spatial patterns in the neighboring regions. GFAP is enriched in cluster

1657  
1658  
1659  
1660  
1661  
1662  
1663  
1664  
1665  
1666  
1667  
1668  
1669  
1670  
1671  
1672  
1673  
1674  
1675  
1676  
1677  
1678  
1679  
1680  
1681  
1682  
1683  
1684  
1685  
1686  
1687  
1688  
1689  
1690  
1691  
1692  
1693  
1694  
1695  
1696  
1697  
1698  
1699  
1700  
1701  
1702

1703 2 of tissue sample 151508, its corresponding meta gene is GFAP+SNORC-  
1704 TMSB10+CDT3-MBP, which is also spatially correlated with the SVGs of  
1705 cluster 2 in the histology image.

1706 As illustrated in Supplementary Fig. 4b, boxplots display Moran's I and  
1707 Geary's C values for spatially variable genes (SVGs) identified by Transform-  
1708 erST, SpatialPCA [38], and Vesalius[39], offering a comparative analysis of  
1709 the performance of these methods in detecting spatial patterns in brain tissue  
1710 slice 151508. Notably, the Moran's I and Geary's C values for SVGs detected  
1711 by SpatialPCA and Vesalius are lower than those identified by Transform-  
1712 erST, indicating a weaker presence of spatial patterns in their results. The  
1713 experimental results with different tissue samples and different cluster domains  
1714 demonstrate TransformerST could mark specific gene-expressed regions for  
1715 different cluster domains.

1716 To illustrate how TransformerST works for different tissue samples, We  
1717 detected the spatial variable genes and meta gene for IDC samples at nearly  
1718 single-cell resolution. As shown in Supplementary Fig. 4c, TransformerST  
1719 detected single SVGs (ACADSB) for cluster 2. Its corresponding meta gene was  
1720 defined as ACADSB+NME2-MUC1+ATP5MPL-CD74+LAPTM4B-CRIP1.  
1721 TransformerST detected DEGS1 SVG for cluster 3, which accords with  
1722 its meta gene DEGS1+RPS18-CXCL14+AGR2-MGP+CSTA-NEAT1 visu-  
1723 ally. TTLL12 is enriched in cluster 4 with its corresponding meta gene as  
1724 TTLL12+HMGN2-MALAT1+KRT8-SLC9A3R1.

1725 The detection outcomes for metagenes and SVGs demonstrate that Trans-  
1726 formerST can effectively identify heterogeneity among spatial domains and  
1727 predict boundaries not recognized by current state-of-the-art methods. These  
1728 findings highlight TransformerST's ability to better uncover spatial patterns  
1729 utilizing a graph transformer network. The detection outcomes for metagenes  
1730 and SVGs showcase that TransformerST not only effectively identifies het-  
1731 erogeneity among spatial domains, but also accurately predicts boundaries  
1732 that remain undetected by current state-of-the-art methods. These findings  
1733 not only highlight TransformerST's superior performance in uncovering spa-  
1734 tial patterns but also emphasize its ability to leverage a graph transformer  
1735 network for a more comprehensive understanding of spatial transcriptomics  
1736 data. Consequently, TransformerST emerges as a valuable tool for researchers  
1737 aiming to analyze complex spatial relationships within biological samples.

1738

## 1739 **S6 Tissue identification and super-resolution in** 1740 **breast cancer block at nearly single-cell** 1741 **resolution with Xenium technology.**

1742

1743 We introduce the cutting-edge Xenium In Situ technology, which has a wide  
1744 field of view and the unique ability to combine gene expression and histo-  
1745 logical pictures (H&E and IF staining) in a single tissue segment. Using this  
1746 method, Chromium scFFPE-seq data were generated from 2 x 25  $\mu$ m FFPE  
1747 sections obtained from a breast cancer block (stage II-B, ER+/PR-/HER2+).  
1748

These sections subjected to scFFPE-seq were situated across the tissue sections 1749  
 employed for Visium and Xenium procedures. 1750

The Visium CytAssist and Xenium platforms were employed to analyze 1751  
 5  $\mu m$  tissue sections adjacent to those used for scFFPE-seq. Prior to imag- 1752  
 ing, sections subjected to Visium were deparaffinized and stained with H&E. 1753  
 The glass slides containing tissue sections were then processed using a Visium 1754  
 CytAssist instrument to transfer analytes to Visium slides. Using the same 1755  
 probe set as in scFFPE-seq, 18,536 genes targeted by 54,018 probes were quan- 1756  
 tified for sections subjected to Visium. The median number of genes in the 1757  
 Visium data set was 5,712, and dimensionality reduction revealed 17 spatial 1758  
 clusters (the same number of clusters as the scFFPE-seq data). The molecular 1759  
 subtypes of ductal carcinoma in situ (DCIS) (hence referred to as DCIS #1 1760  
 and DCIS #2) and invasive tumors were each identified as separate clusters 1761  
 by scFFPE-seq, and Visium was able to determine their exact locations. 1762

We use the following pipeline to show the performance of the proposed 1763  
 method. Firstly, we choose the region of interest using the Visium image. 1764  
 Then we obtain the corresponding higher-resolution image and gene expression 1765  
 using Xenium technology. We perform cell segmentation. To allocate mRNAs 1766  
 to cells, facilitating subsequent analysis and integration with Chromium and 1767  
 Visium data, the spatial boundaries between cells and mRNA transcripts need 1768  
 to be determined. Initially, DAPI images were employed to identify nuclei 1769  
 using a neural network. Subsequently, each nucleus was expanded outward up 1770  
 to a maximum distance of 15  $\mu m$  or until encountering the border of another 1771  
 cell. With the original Visium image, we perform cell-type clustering. Next, 1772  
 we employ the proposed method to perform super-resolution, utilizing the 1773  
 clustering and cell segmentation outcomes. The processed steps are shown in 1774  
 Supplementary Fig. 5a. 1775

As shown in Supplementary Fig. 5b, similar to Xenium, the proposed 1776  
 method is able to pinpoint precisely where adipocyte markers are located, 1777  
 but it shows much more detail in cases when adipocyte transcripts escape the 1778  
 boundaries of the cells. The examination of TransformerST and BayesSpace 1779  
 demonstrates that the methods can be replicated with high precision. Notably, 1780  
 strong correlations were observed between the quantities of transcripts and the 1781  
 proportions of cell types in these replicates, further validating the effectiveness 1782  
 and reproducibility of the approaches. 1783

1784  
 1785  
 1786  
 1787  
 1788  
 1789  
 1790  
 1791  
 1792  
 1793  
 1794

1795  
 1796  
 1797  
 1798  
 1799  
 1800  
 1801  
 1802  
 1803  
 1804  
 1805  
 1806  
 1807  
 1808  
 1809  
 1810  
 1811  
 1812  
 1813  
 1814  
 1815  
 1816  
 1817  
 1818  
 1819  
 1820  
 1821  
 1822  
 1823  
 1824  
 1825  
 1826  
 1827  
 1828  
 1829  
 1830  
 1831  
 1832  
 1833  
 1834  
 1835  
 1836  
 1837  
 1838  
 1839  
 1840

a

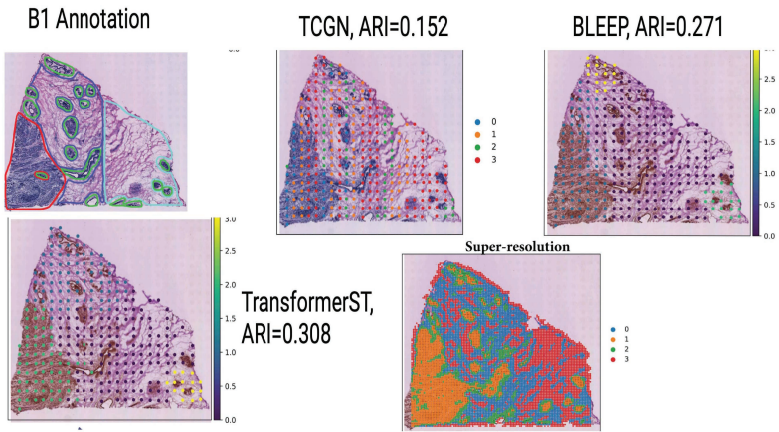

b

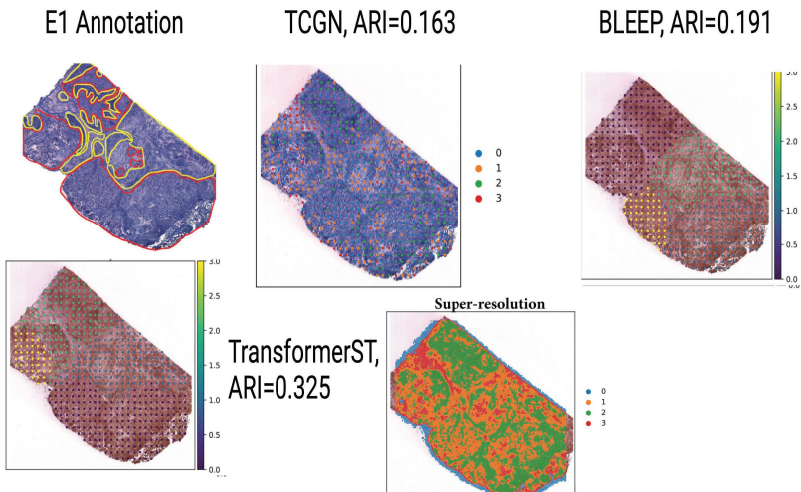

**Supplementary Figure 3** Super-resolved gene expression prediction with breast cancer data. The first column displays the histology image accompanied by pathologists' annotations, in which the red lines represent invasive cancer, green lines signify breast glands, yellow lines indicate immune infiltration and blue lines denote connective tissue. a, Tissue type assignments and nearly single cell super-resolution using B1 section. b, Tissue type assignments and nearly single cell super-resolution using E1 section. *TransformerST* refers to the clustering results obtained from *TransformerST*. Super-resolution, on the other hand, represents the ability of the method to achieve sub-cellular resolution performance in enhancing the spatial transcriptomics data.



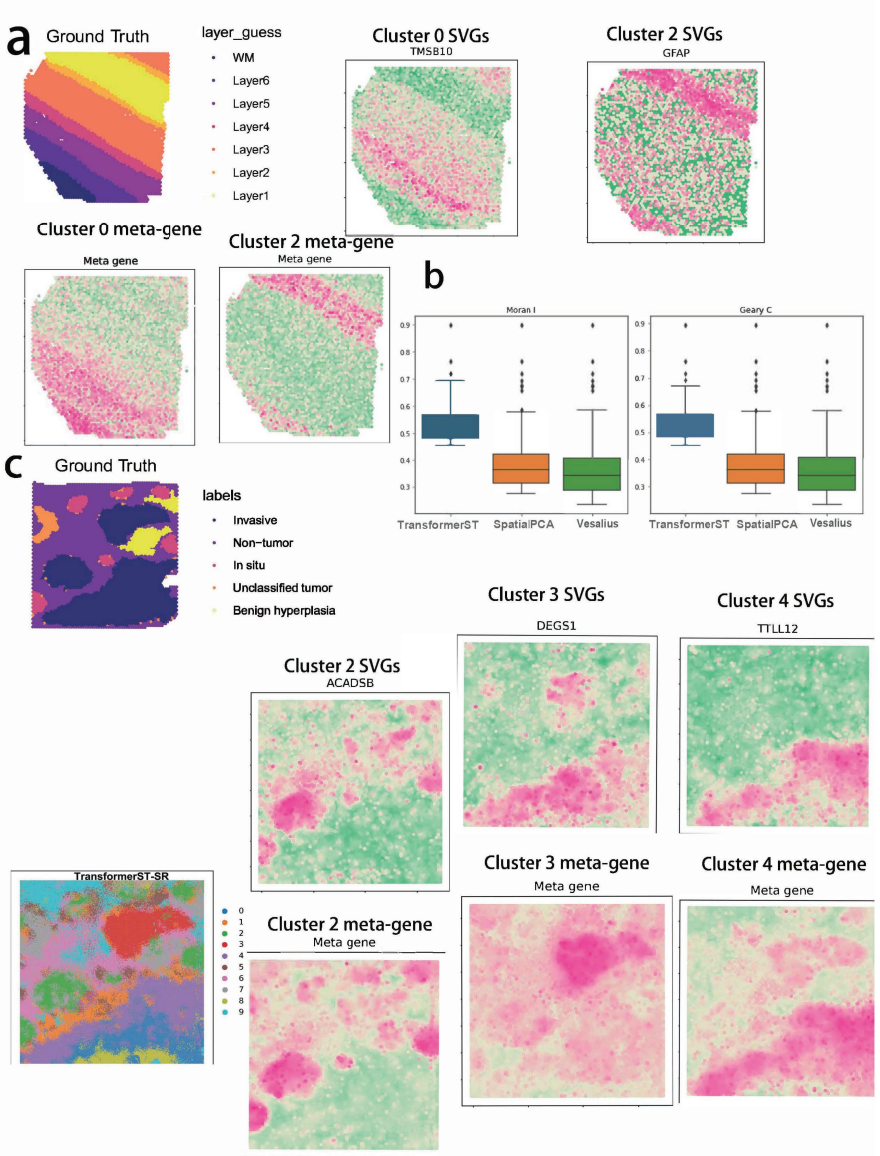

**Supplementary Figure 4** Spatial variable genes (SVGs) and meta gene detection. a, SVGs and corresponding meta genes for cluster 0 (TMSB10, TMSB10+MBP-MT-CO2), cluster 2 (GFAP, GFAP+SNORC-TMSB10+CDT3-MBP) in brain tissue slice 151508 at spot resolution. b, Boxplots of Moran's I and Geary's C values for SVGs detected by TransformerST, SpatialPCA, and Vesalius using brain tissue slice 151508. c, SVGs and corresponding meta gene for cluster 2 (ACADSB, ACADSB+NME2-MUC1+ATP5MPL-CD74+LAPTM4B-CRIP1), cluster 3 (DEGS1, DEGS1+RPS18-CXCL14+AGR2-MGP+CSTA-NEAT1), and cluster 4 (TTLL12, TTLL12+HMG2-MALAT1+KRT8-SLC9A3R1) in IDC sample at nearly single cell resolution. Pathologist annotated different regions in different colors (IC outlined in red, carcinoma in yellow, benign hyperplasia in green, unclassified tumor in grey).

1841  
1842  
1843  
1844  
1845  
1846  
1847  
1848  
1849  
1850  
1851  
1852  
1853  
1854  
1855  
1856  
1857  
1858  
1859  
1860  
1861  
1862  
1863  
1864  
1865  
1866  
1867  
1868  
1869  
1870  
1871  
1872  
1873  
1874  
1875  
1876  
1877  
1878  
1879  
1880  
1881  
1882  
1883  
1884  
1885  
1886

1887  
 1888  
 1889  
 1890  
 1891  
 1892  
 1893  
 1894  
 1895  
 1896  
 1897  
 1898  
 1899  
 1900  
 1901  
 1902  
 1903  
 1904  
 1905  
 1906  
 1907  
 1908  
 1909  
 1910  
 1911  
 1912  
 1913  
 1914  
 1915  
 1916  
 1917  
 1918  
 1919  
 1920  
 1921  
 1922  
 1923  
 1924  
 1925  
 1926  
 1927  
 1928  
 1929  
 1930  
 1931  
 1932

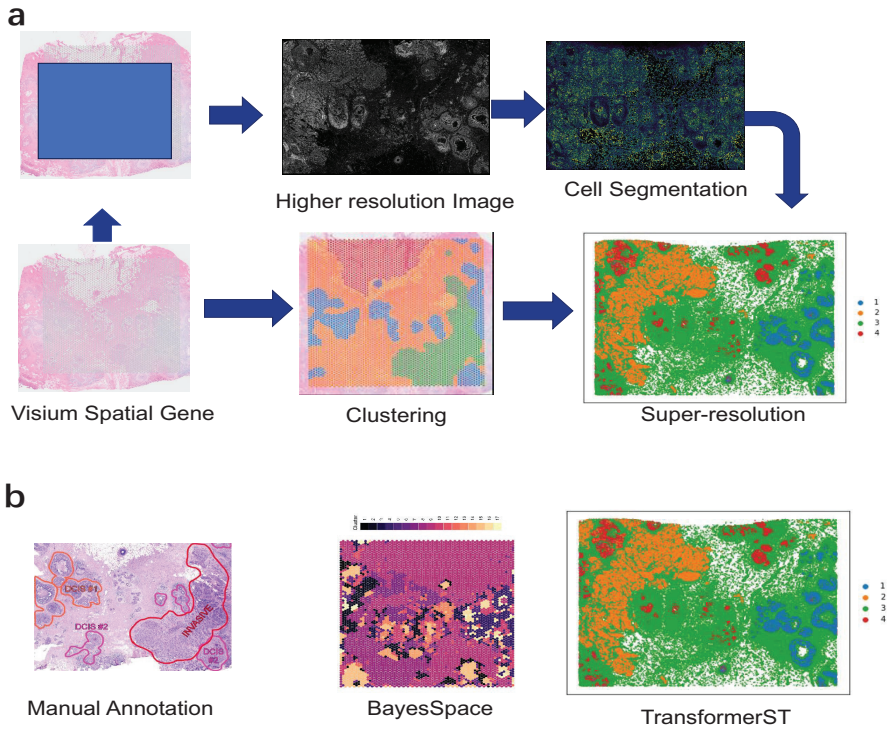

**Supplementary Figure 5** Tissue identification and super-resolution in breast cancer block at nearly single-cell resolution with Xenium technology. a, Schematic illustration of TransformerST with Xenium data. b, Tissue identification in breast cancer tissue with Xenium and Visium data.
